# Supplementary material for: A ratiometric fluorescent probe for imaging the fluctuation of HOBr during endoplasmic reticulum stress
Source: Royal Society of Chemistry journal article supplement (doi:10.1039/d3tb02679e), 2023-12-29
Supplement: d3tb02679e1.pdf [file d3tb02679e1.pdf]

## **A ratiometric fluorescent probe for imaging the fluctuation of H<sub>2</sub>O<sub>2</sub> during endoplasmic reticulum stress**

Bingpeng Guo,<sup>a</sup> Mengyu Li,<sup>a</sup> Guiwen Hao,<sup>a</sup> Liangchen Wei,<sup>c</sup> Honghan Sa,<sup>a</sup> Jianbin  
Chen,<sup>\*a</sup> Wei Shu<sup>\*c</sup> and Changxiang Shao<sup>\*b</sup>

<sup>a</sup> *School of Chemistry and Chemical Engineering, Qilu University of Technology (Shandong Academy of Sciences), Jinan, 250103, China.*

<sup>b</sup> *School of Chemistry and Pharmaceutical Engineering, Medical Science and Technology Innovation Center, Shandong First Medical University & Shandong Academy of Medical Sciences, Jinan, 250117, China.*

<sup>c</sup> *School of Life Sciences and Medicine, Shandong University of Technology, Zibo, 255000, China.*

E-mail: [jchen@qlu.edu.cn](mailto:jchen@qlu.edu.cn); [jdshuwei@163.com](mailto:jdshuwei@163.com); [cxshao@sdfmu.edu.cn](mailto:cxshao@sdfmu.edu.cn).

## **Contents**

- 1. Comparison of fluorescent probes for HOBr detection**
- 2. The mass spectrum of the reaction mixture of ER-NABr with HOBr**
- 3. The response time of ER-NABr for HOBr**
- 4. The pH effect of ER-NABr for HOBr**
- 5. The absorption titration spectra of ER-NABr with HOBr**
- 6. The reaction mechanism of the ER-NABr with ONOO<sup>-</sup>**
- 7. The cytotoxicity of ER-NABr**
- 8. The synthesis route for the ER-NABr**
- 9. Spectral data of ER-NABr**

## 1 · Comparison of fluorescent probes for HOBr detection

**Table S1.** Comparison of fluorescent probes for HOBr detection.

| Probe                                                                               | Detection Limit | Response mode | $\lambda_{em}$ (nm) | Organelle-targeting | Reference                                                          |
|-------------------------------------------------------------------------------------|-----------------|---------------|---------------------|---------------------|--------------------------------------------------------------------|
| 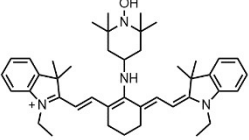   | /               | Turn-off      | 755                 | /                   | Chem. Commun, 2012, 48, 7735                                       |
|    | 0.97 $\mu$ M    | Turn-on       | 635                 | /                   | Chem. Commun, 2013, 49, 5790                                       |
|   | 17 pM           | Turn-on       | 525                 | /                   | Angew. Chem. Int. Ed, 2016, 55, 12751                              |
|  | 1.8 nM          | Ratio         | 528/437             | mitochondria        | Chem. Commun, 2018,54, 12198                                       |
|  | 33.5 nM         | Turn-off      | 540                 | lysosome            | Spectrochim. Acta Part A Mol. Biomol. Spectrosc, 2019, 212, 48     |
|  | 660 nM          | Turn-off      | 655                 | /                   | Spectrochim. Acta Part A Mol. Biomol. Spectrosc, 2019, 222, 117240 |
|  | 30.6 nM         | Turn-on       | 460                 | /                   | Sensors and Actuators B, 2020, 315, 128125                         |
|  | 296 nM          | Turn-on       | 560                 | lysosome            | Chem. Commun, 2021, 57, 12679                                      |

|                                                                                     |               |              |                |                              |                                            |
|-------------------------------------------------------------------------------------|---------------|--------------|----------------|------------------------------|--------------------------------------------|
| 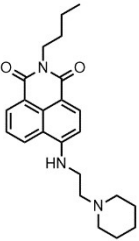   | 200 nM        | Turn-on      | 505            | /                            | Sensors and Actuators B, 2020, 305, 127460 |
|    | 256 nM        | Turn-off     | 600            | /                            | Chem. Commun, 2023, 59, 1018               |
|    | 99 nM         | Ratio        | 610/555        | lysosome                     | Sensors and Actuators B, 2019, 297, 126826 |
|   | 20 pM         | Turn-on      | 663            | mitochondria                 | Anal. Chem, 2017, 89, 1787                 |
|  | 15 nM         | Turn-on      | 505            | lysosome                     | Anal. Chem, 2022, 94, 11783                |
|  | 1.37 nM       | Turn-off     | 590            | /                            | Dyes Pigments, 2023, 217, 111381           |
|  | 119 nM        | Turn-on      | 470            | /                            | Talanta, 2024, 266, 124969                 |
|  | <b>138 nM</b> | <b>Ratio</b> | <b>610/560</b> | <b>endoplasmic reticulum</b> | <b>This work</b>                           |

## 2. The mass spectrum of the reaction mixture of ER-NABr with HOBr

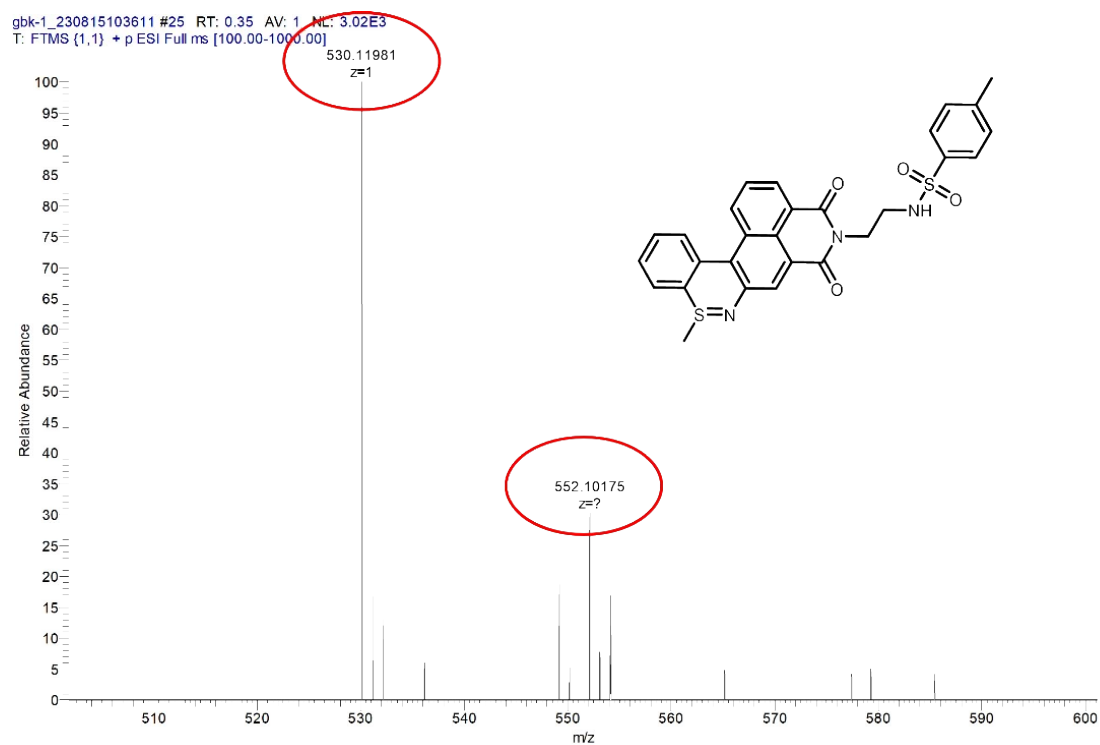

**Fig. S1.** The mass spectrum of the reaction mixture of **ER-NABr** with HOBr.

### 3. The response time of ER-NABr for HOBr

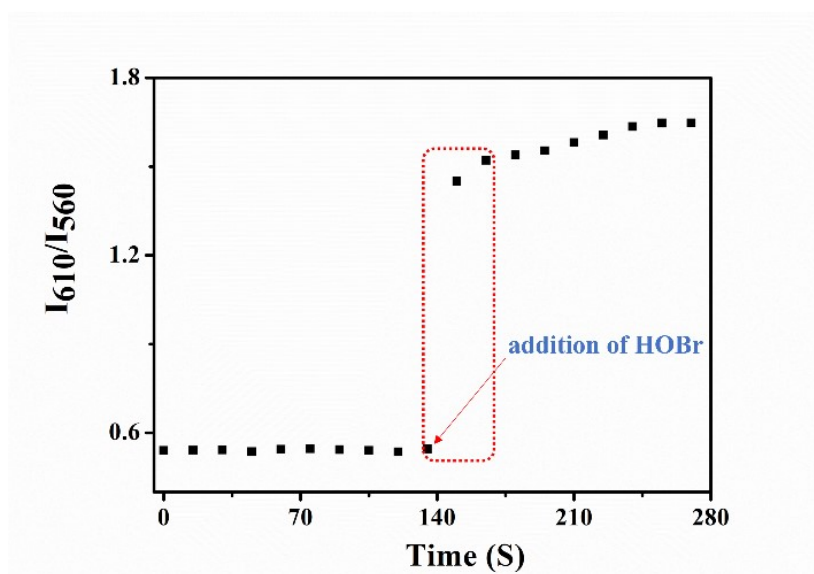

**Fig. S2.** The ratio  $I_{610}/I_{560}$  of **ER-NABr** (10  $\mu\text{M}$ ) after the addition of HOBr (50  $\mu\text{M}$ ).

### 4. The pH effect of ER-NABr for HOBr

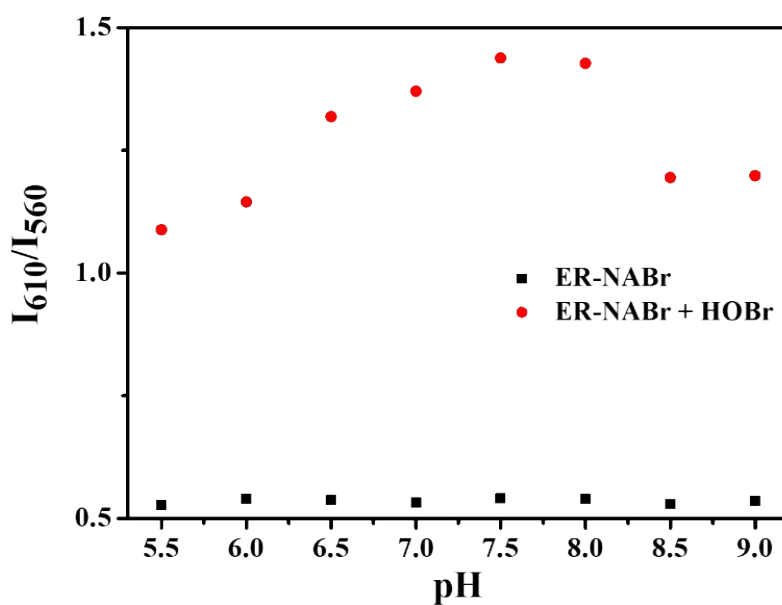

**Fig. S3.** pH effect on the ratio  $I_{610}/I_{560}$  of ER-NABr (10  $\mu\text{M}$ ) in the absence and presence of HOBr (50  $\mu\text{M}$ ).

### 5. The absorption titration spectra of ER-NABr with HOBr

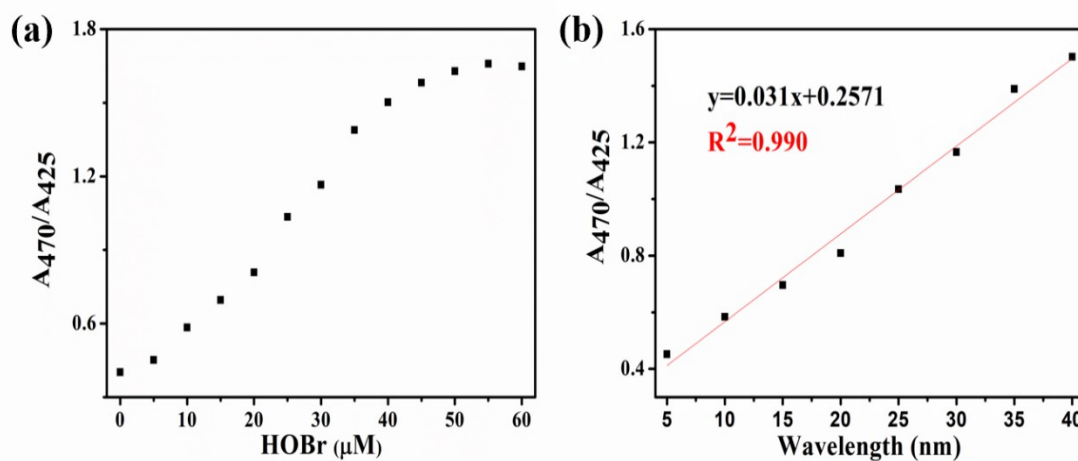

**Fig. S4.** (a) The ratio of  $A_{470}/A_{425}$  of ER-NABr (10  $\mu\text{M}$ ) upon different amounts of HOBr (0-60  $\mu\text{M}$ ). (b) The plot of absorbance intensity ratio ( $A_{470}/A_{425}$ ) of ER-NABr (10  $\mu\text{M}$ ) vs different amounts of HOBr (5-40  $\mu\text{M}$ ).

### 6. The reaction mechanism of the ER-NABr with ONOO $\cdot$ .

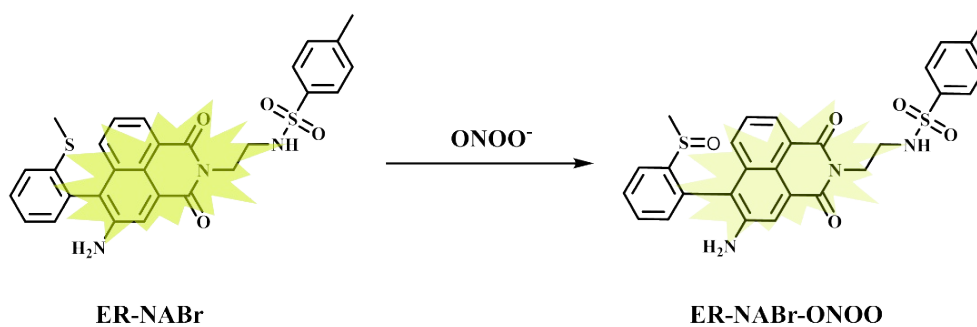

**Scheme S1.** The reaction mechanism of the **ER-NABr** with  $\text{ONOO}^-$ .

### 7. The cytotoxicity of ER-NABr

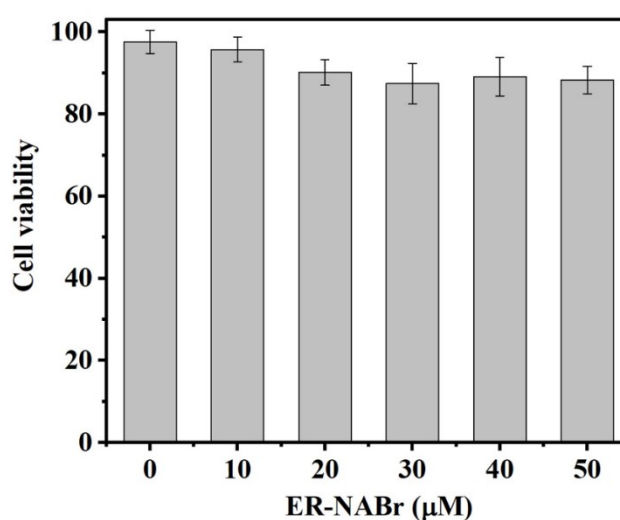

**Fig. S5.** Cytotoxicity assays of **ER-NABr** at different concentrations for HeLa cells. The data shown with the average value ( $n = 5$ ).

### 8. The synthesis route of the ER-NABr

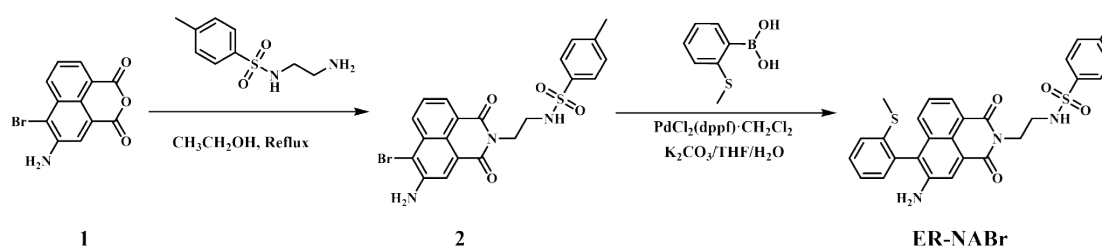

**Scheme S2.** Synthesis route of the **ER-NABr**.

### 9. Spectral data of ER-NABr

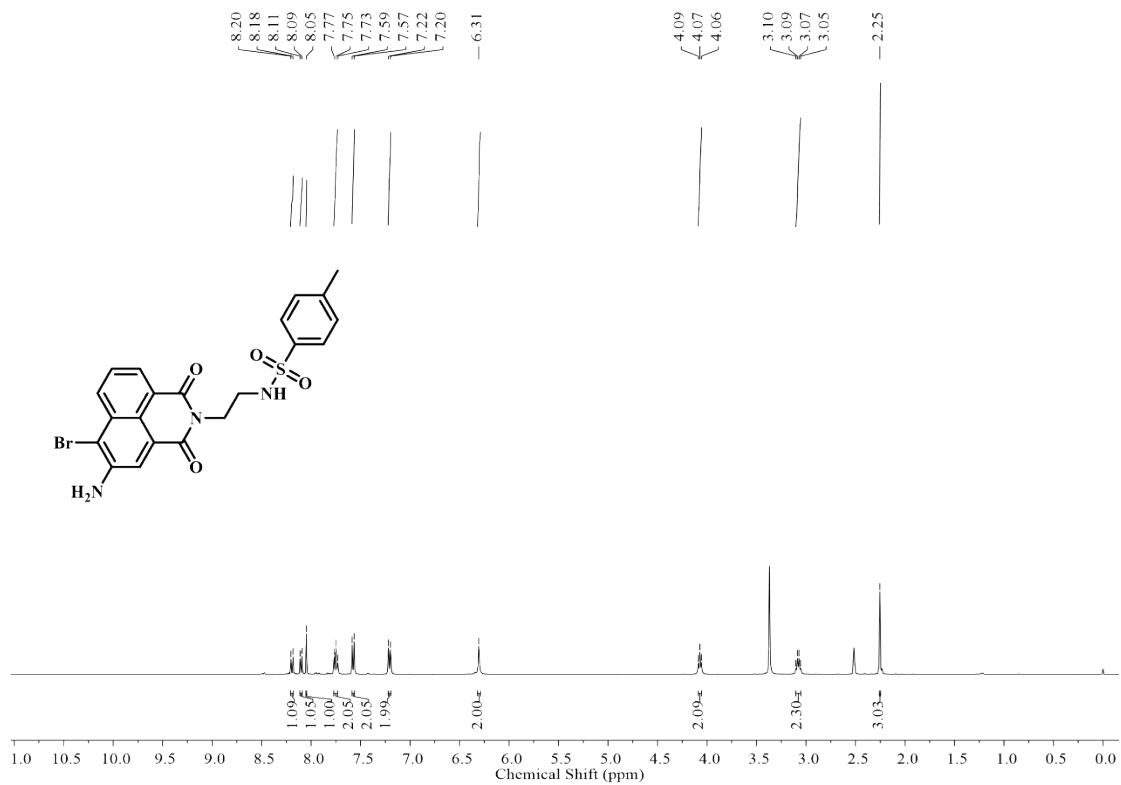

**Fig. S6.** <sup>1</sup>H-NMR of compound 2

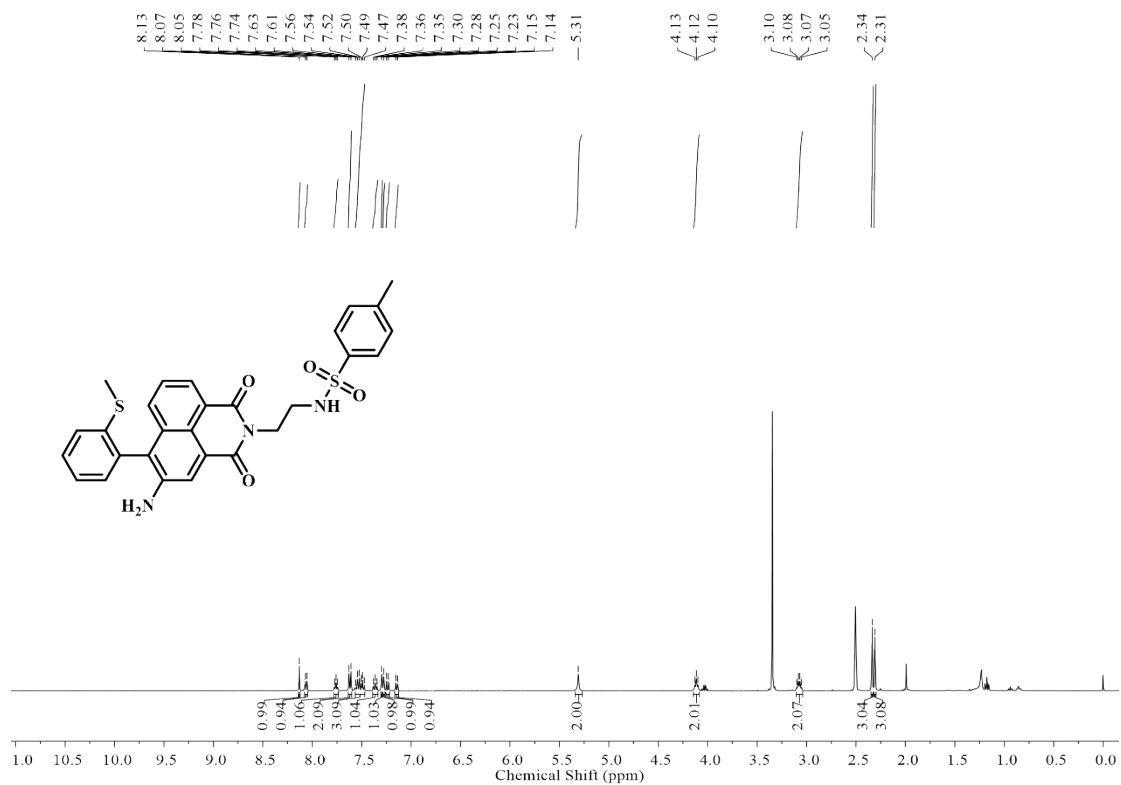

**Fig. S7.** <sup>1</sup>H-NMR of ER-NABr.



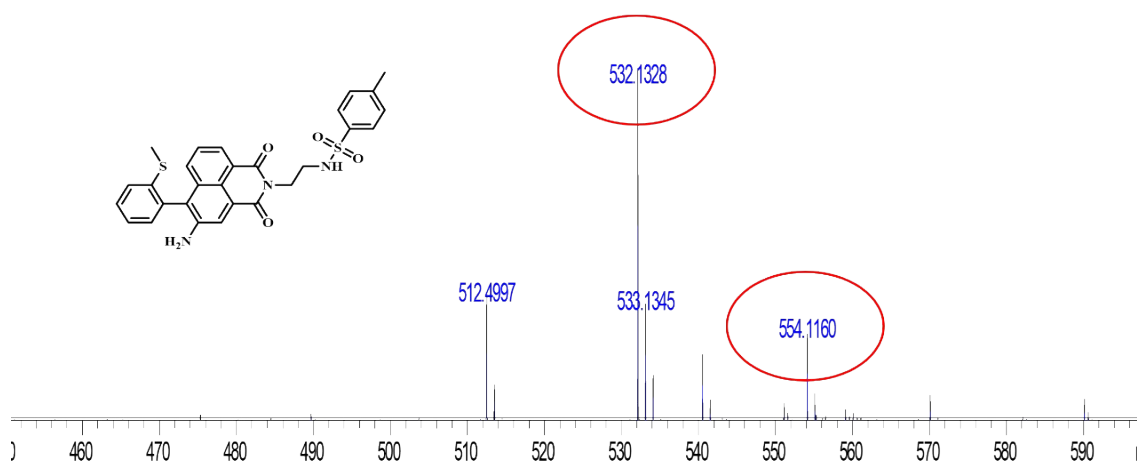

**Fig. S8.** The mass spectrum of ER-NABr.
